# Supplementary material
Source: PubMed Central journal article supplement (PMC8579264)
Supplement: advancesADV2021005314-suppl1.pdf [file advancesADV2021005314-suppl1.pdf]

**Supplemental table 1** Risk of bias assessment in prevalence studies

| <b>Risk of bias items</b>                                                                                                                            | <b>Daviet<br/>2020</b> | <b>Dulrue<br/>2020</b> | <b>Helms<br/>2020</b> | <b>Ionescu<br/>2020</b> | <b>Patell<br/>2020</b> | <b>Santi<br/>2020</b> | <b>Lawler<br/>2021</b> |
|------------------------------------------------------------------------------------------------------------------------------------------------------|------------------------|------------------------|-----------------------|-------------------------|------------------------|-----------------------|------------------------|
| 1. Was the study's target population a close representation of the national population in relation to relevant variables, e.g. age, sex, occupation? | No                     | No                     | No                    | No                      | No                     | No                    | Yes                    |
| 2. Was the sampling frame a true or close representation of the target population?                                                                   | No                     | Yes                    | Yes                   | Yes                     | No                     | Yes                   | Yes                    |
| 3. Was some form of random selection used to select the sample, OR, was a census undertaken?                                                         | No                     | No                     | No                    | No                      | No                     | No                    | Yes                    |
| 4. Was the likelihood of non-response bias minimal?                                                                                                  | Yes                    | Yes                    | Yes                   | Yes                     | No                     | No                    | Yes                    |
| 5. Were data collected directly from the subjects (as opposed to a proxy)?                                                                           | Yes                    | Yes                    | Yes                   | Yes                     | Yes                    | Yes                   | Yes                    |
| 6. Was an acceptable case definition used in the study?                                                                                              | Yes                    | Yes                    | Yes                   | Yes                     | Yes                    | Yes                   | Yes                    |
| 7. Was the study instrument that measured the parameter of interest (e.g. prevalence of low back pain) shown to have reliability and                 | Yes                    | Yes                    | No                    | No                      | Yes                    | No                    | Yes                    |

|                                                                                                |                 |            |            |            |                 |                 |            |
|------------------------------------------------------------------------------------------------|-----------------|------------|------------|------------|-----------------|-----------------|------------|
| validity (if necessary)?                                                                       |                 |            |            |            |                 |                 |            |
| 8. Was the same mode of data collection used for all subjects?                                 | Yes             | Yes        | Yes        | Yes        | Yes             | Yes             | Yes        |
| 9. Was the length of the shortest prevalence period for the parameter of interest appropriate? | Yes             | Yes        | Yes        | Yes        | Yes             | Yes             | Yes        |
| 10. Were the numerator(s) and denominator(s) for the parameter of interest appropriate?        | No              | Yes        | Yes        | Yes        | No              | Yes             | Yes        |
| <b>Summary item on the overall risk of study bias</b>                                          | <b>Moderate</b> | <b>Low</b> | <b>Low</b> | <b>Low</b> | <b>Moderate</b> | <b>Moderate</b> | <b>Low</b> |

**Supplementary figure S1** The pooled incidence of HIT in COVID-19 patients from 4 studies with specified diagnostic criteria for HIT

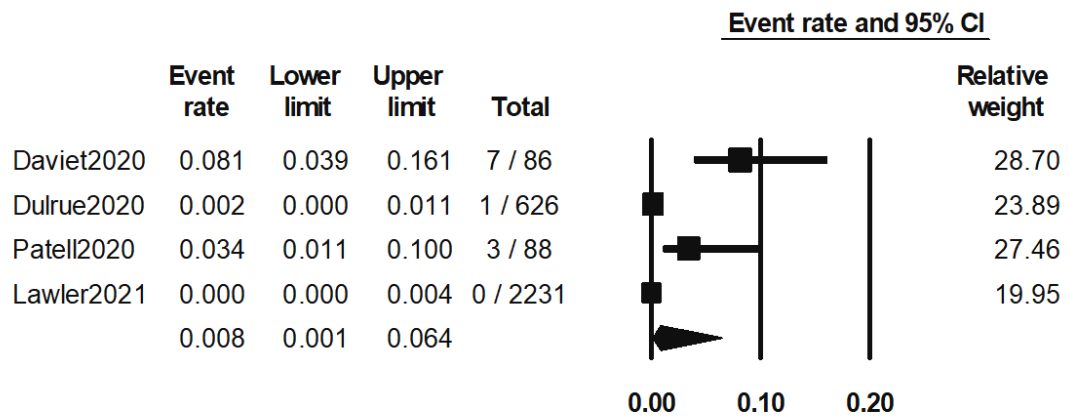

Heterogeneity:  $df = 3$  ( $P < 0.001$ );  $I^2 = 89\%$
